# Supplementary material for: Robust superhydrophobic attapulgite coated polyurethane sponge for efficient immiscible oil/water mixture and emulsion separation
Source: Royal Society of Chemistry journal article supplement (doi:10.1039/c6ta07535e), 2016-01-01
Supplement: c6ta07535e1.pdf [file c6ta07535e1.pdf]

Electronic Supplementary Information

**Robust superhydrophobic attapulgite coated polyurethane sponge  
for efficient immiscible oil/water mixture and emulsion separation**

Jian Li <sup>\*</sup>, Changcheng Xu, Yan Zhang, Rongfang Wang, Fei Zha, Houde She  
Key Laboratory of Eco-Environment-Related Polymer Materials, Ministry of  
Education of China, Key Laboratory of Gansu Polymer Materials, College of  
Chemistry and Chemical Engineering, Northwest Normal University, Lanzhou  
730070, China

Corresponding author email: [jianli83@126.com](mailto:jianli83@126.com);

### Supplementary figure and movie captions:

**Fig. S1.** (a) The fine XPS spectrum of C 1s and (b) O 1s in APT monolith modified with OTS before and after.

**Fig. S2.** The TEM images of (a) pristine APT and (b) APT modified with OTS.

**Fig. S3.** Photographs of the selective adsorption of (a-c) kerosene (light oil) and (d-f) tetrachloroethane (heavy oil) by the coated sponges (Oil is dyed with Oil Red).

**Fig. S4.** The effect of loading ratio of superhydrophobic APT on separation efficiency of immiscible kerosene/water mixture and oil content in filtrate.

**Fig. S5.** Separation efficiency and oil content versus recycle numbers by taking immiscible kerosene/water mixture as an example.

**Fig. S6.** The process of tetrachloroethane adsorption from (a-d) the ice water mixture, (e-h) tetrachloroethane/water mixture at 60 °C, and (i-l) tetrachloroethane/water mixture under turbulent condition. The tetrachloroethane was dyed with oil red.

**Fig. S7.** Photographs illustrating the progress of removal of diesel from (a) 1 M HCl, (b) 1M NaCl, (c) 1 M NaOH, and (d) hot water system with violent agitation (Oil is dyed with Oil Red).

**Fig. S8.** The separation efficiency of diesel and corrosive solutions and hot water mixtures.

**Fig. S9.** (a) The system of continuously remove kerosene (light oil as an example) from water. (b-d) The process of kerosene adsorption from the water with the help of vacuum system.

**Fig. S10.** Microscope images and digital photos of the separation results for various

types of oil-in-water emulsions, including (a) kerosene-in-water emulsion, (b) petroleum ether-in-water emulsion, (c) diesel-in-water emulsion, (d) n-hexane-in-water emulsion.

**Fig. S11.** Particle size distribution before and after separation for various types oil-in-water emulsions, including (a) kerosene-in-water emulsion, (b) petroleum ether-in-water emulsion, (c) diesel-in-water emulsion, (d) n-hexane-in-water emulsion.

**Fig. S12.** The effect of loading ratio of superhydrophobic APT on separation efficiency of kerosene-in-water emulsion and trace oil content in filtrate.

**Fig. S13.** (a) FT-IR spectra (b) UV-VIS spectrum of the surfactant stabilized hexane-in-water emulsion before and after separation.

**Movie S1.** The continuous absorption process by taking kerosene/water mixture as an example (kerosene is dyed with Oil Red O and water is dyed with methylene blue).

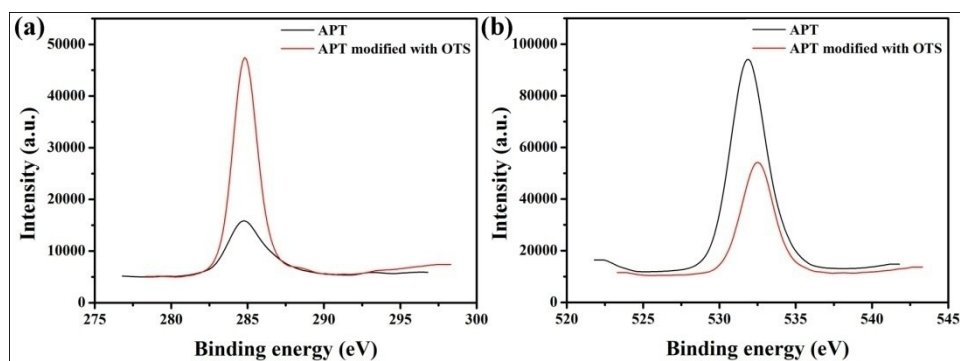

**Fig. S1.** (a) The fine XPS spectrum of C 1s and (b) O 1s in APT monolith modified with OTS before and after.

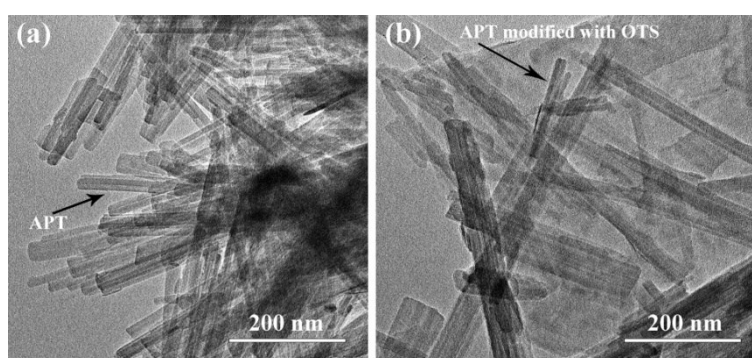

**Fig. S2.** The TEM images of (a) pristine APT and (b) APT modified with OTS.

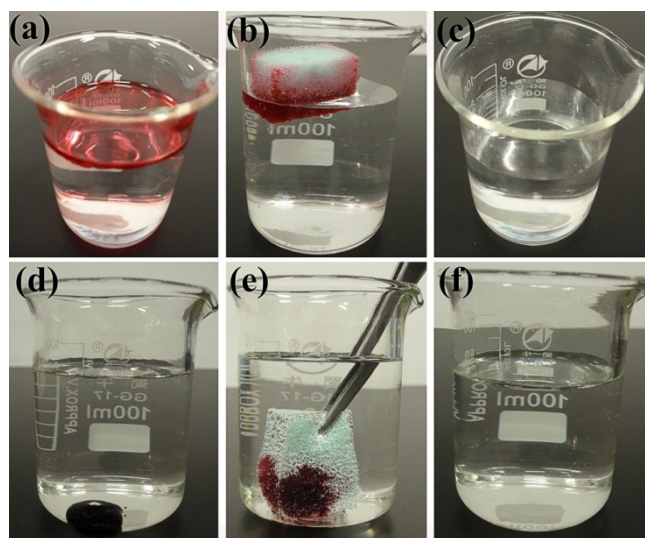

**Fig. S3.** Photographs of the selective adsorption of (a-c) kerosene (light oil) and (d-f) tetrachloroethane (heavy oil) by the coated sponges (Oil is dyed with Oil Red).

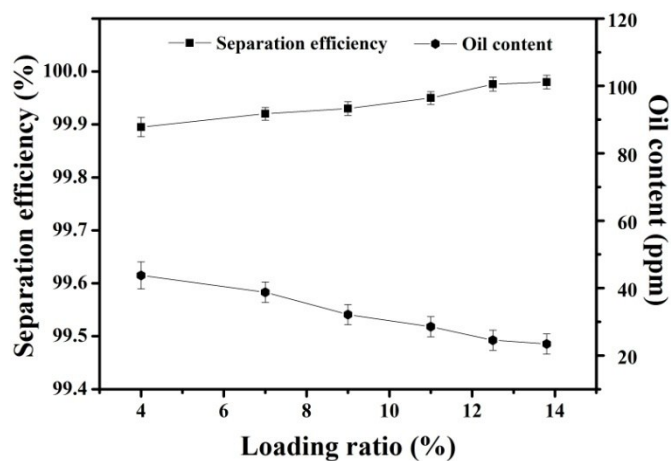

**Fig. S4.** The effect of loading ratio of superhydrophobic APT on separation efficiency of immiscible kerosene/water mixture and oil content in filtrate.

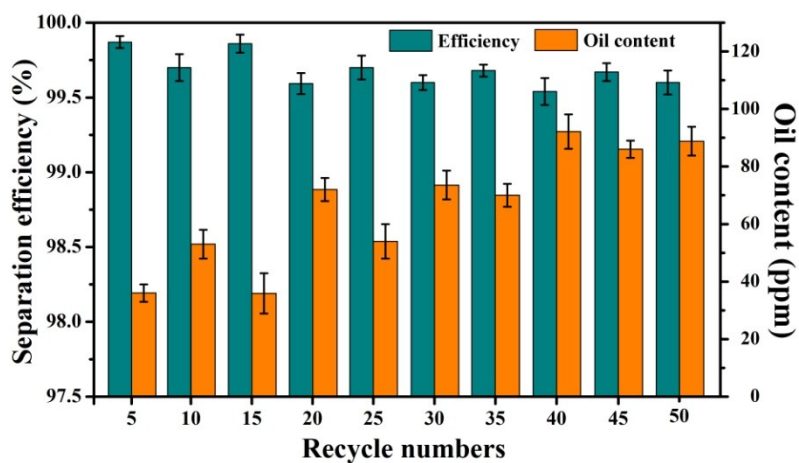

**Fig. S5.** Separation efficiency and oil content versus recycle numbers by taking immiscible kerosene/water mixture as an example.

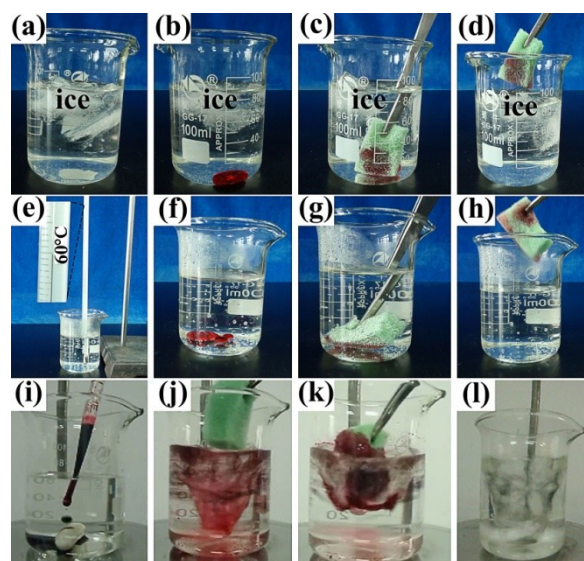

**Fig. S6.** The process of tetrachloroethane adsorption from (a-d) the ice water mixture, (e-h) tetrachloroethane/water mixture at 60 °C, and (i-l) tetrachloroethane/water mixture under turbulent condition. The tetrachloroethane was dyed with oil red.

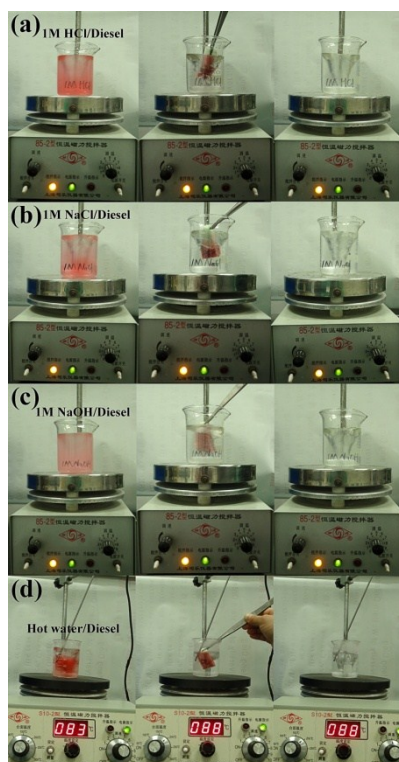

**Fig. S7.** Photographs illustrating the progress of removal of diesel from (a) 1 M HCl, (b) 1M NaCl, (c) 1 M NaOH, and (d) hot water system with violent agitation (Oil is dyed with Oil Red).

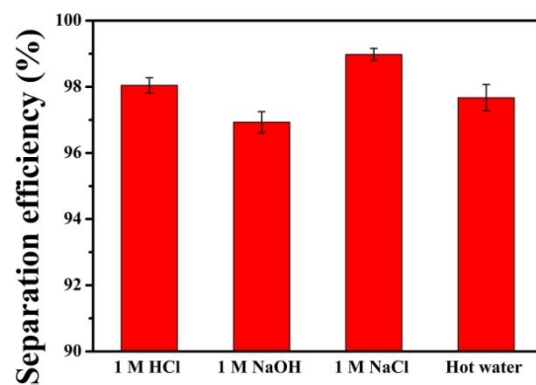

**Fig. S8.** The separation efficiency of diesel and corrosive solutions and hot water mixtures.

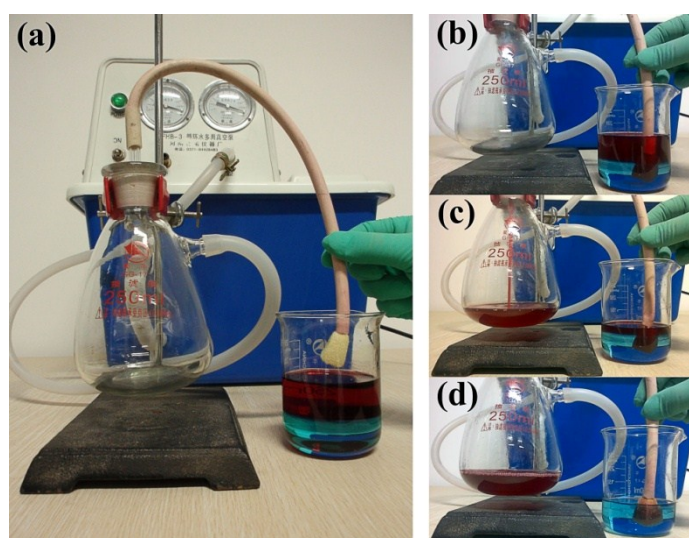

**Fig. S9.** (a) The system of continuously remove kerosene (light oil as an example) from water. (b-d) The process of kerosene adsorption from the water with the help of vacuum system.

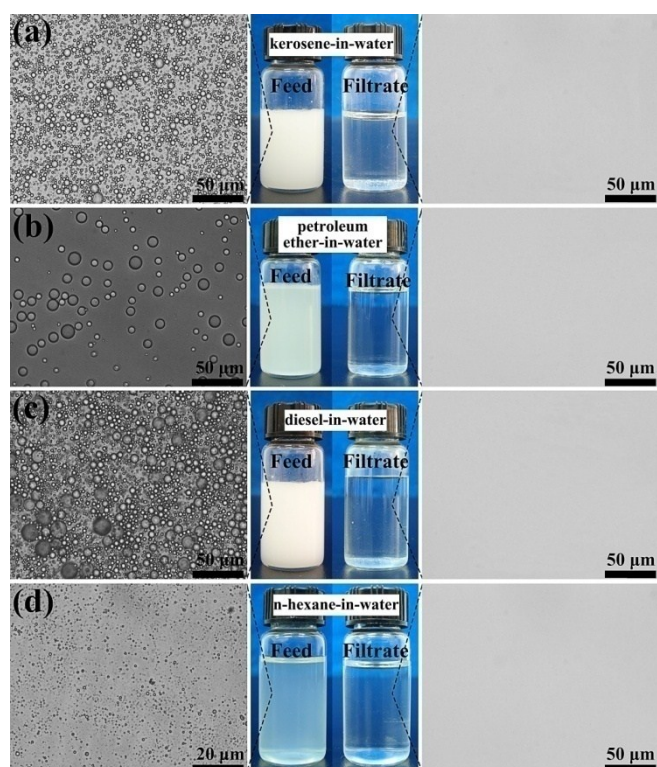

**Fig. S10.** Microscope images and digital photos of the separation results for various types of oil-in-water emulsions, including (a) kerosene-in-water emulsion, (b) petroleum ether-in-water emulsion, (c) diesel-in-water emulsion, (d) n-hexane-in-water emulsion.



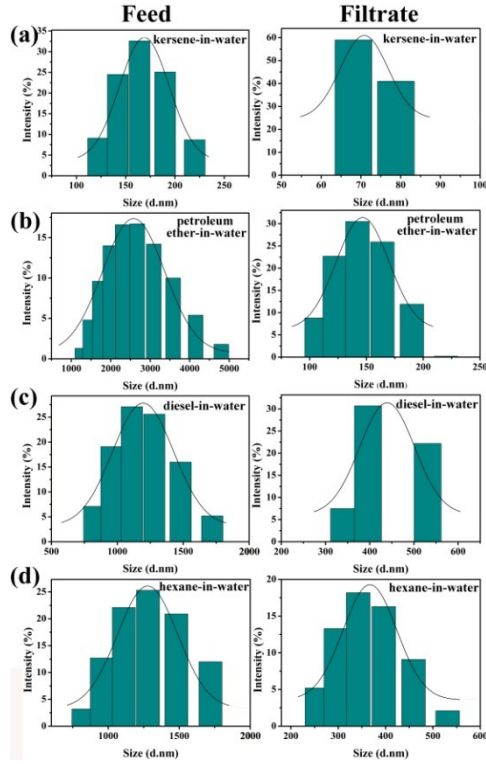

**Fig. S11.** Particle size distribution before and after separation for various types oil-in-water emulsions, including (a) kerosene-in-water emulsion, (b) petroleum ether-in-water emulsion, (c) diesel-in-water emulsion, (d) n-hexane-in-water emulsion.

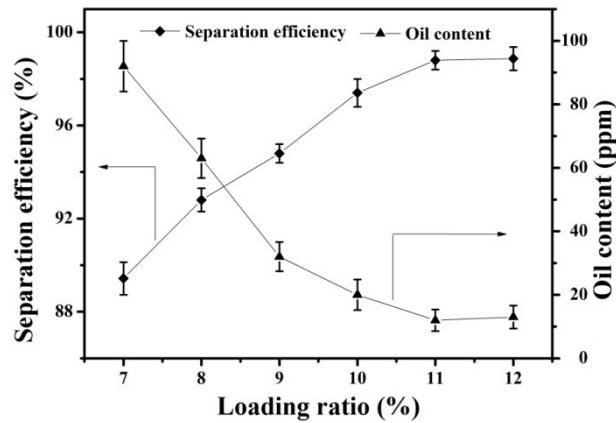

**Fig. S12.** The effect of loading ratio of superhydrophobic APT on separation efficiency of kerosene-in-water emulsion and trace oil content in filtrate.

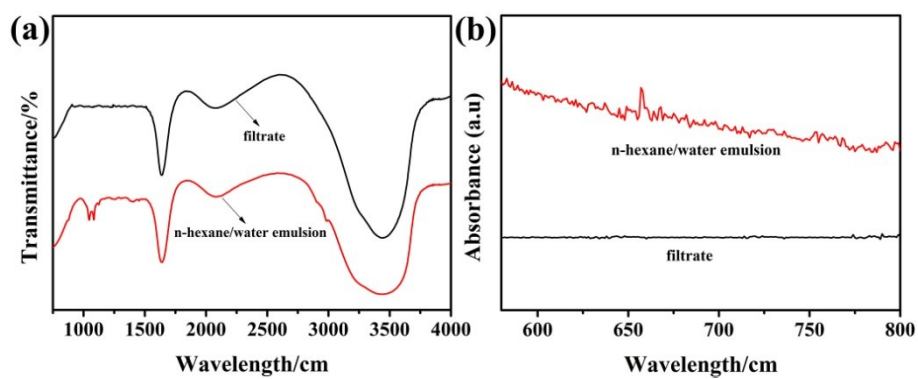

**Fig. S13.** (a) FTIR spectra (b) UV-VIS spectrum of the surfactant stabilized hexane-in-water emulsion before and after separation.
